# Supplementary material for: Association between dietary fatty acid patterns based on principal component analysis and fatty acid compositions of serum and breast milk in lactating mothers in Nanjing, China
Source: Royal Society of Chemistry journal article supplement (doi:10.1039/d0fo03436c), 2021-01-01

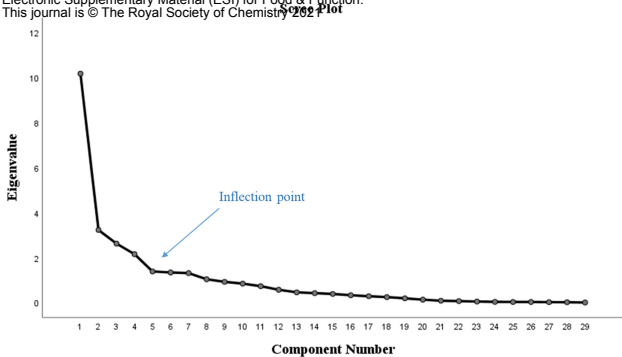

Supplement: d0fo03436c2.pdf [file d0fo03436c2.pdf]
