# Supplementary material for: Association between dietary fatty acid patterns based on principal component analysis and fatty acid compositions of serum and breast milk in lactating mothers in Nanjing, China
Source: Royal Society of Chemistry journal article supplement (doi:10.1039/d0fo03436c), 2021-01-01
Supplement: d0fo03436c3.pdf [file d0fo03436c3.pdf]

## Supplementary information

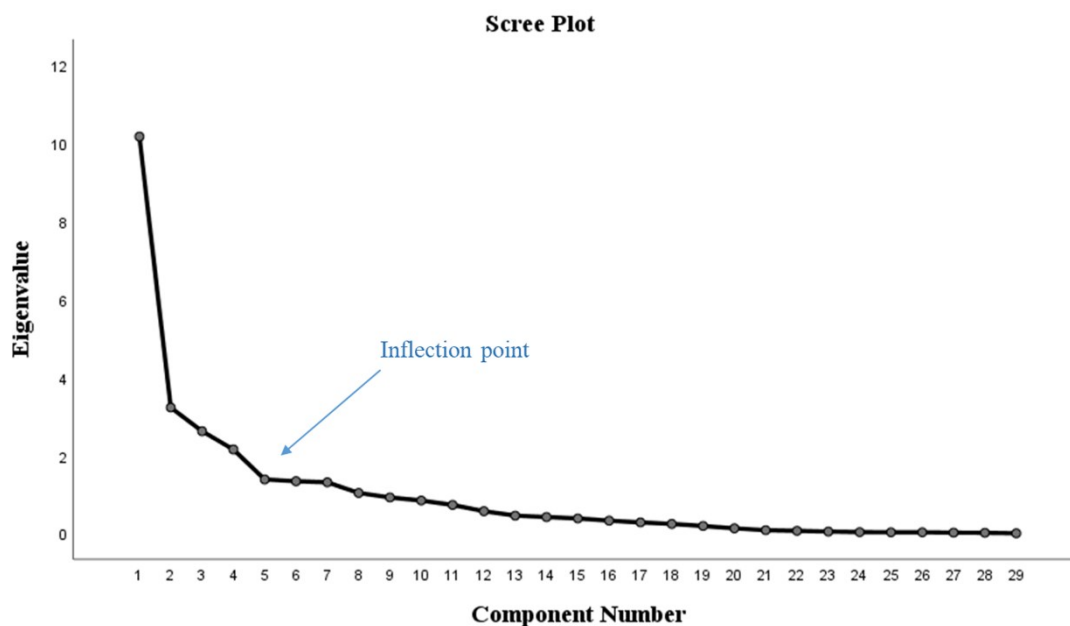

Fig. 1 Scree plot of eigenvalues for the 29 different types of fatty acids based on principal component analysis with varimax rotation.

Components with an eigenvalue  $>2$  were retained.

Table 1 Rotated component matrix among the different fatty acid patterns

| Fatty acid | Score coefficient |           |           |           |
|------------|-------------------|-----------|-----------|-----------|
|            | Pattern 1         | Pattern 2 | Pattern 3 | Pattern 4 |
| C4:0       | 0.358             | 0.058     | 0.106     | 0.828     |
| C6:0       | 0.199             | 0.051     | 0.710     | 0.060     |
| C8:0       | 0.325             | 0.075     | 0.872     | -0.082    |
| C10:0      | 0.712             | 0.035     | 0.462     | -0.046    |
| C12:0      | 0.563             | 0.050     | 0.744     | -0.073    |
| C14:0      | 0.881             | 0.135     | 0.335     | 0.027     |
| C16:0      | 0.861             | 0.223     | 0.182     | 0.206     |

|       |        |        |        |        |
|-------|--------|--------|--------|--------|
| C18:0 | 0.897  | 0.265  | 0.094  | 0.104  |
| C20:0 | 0.437  | 0.696  | 0.192  | 0.123  |
| C22:0 | 0.201  | 0.850  | 0.059  | 0.042  |
| C24:0 | 0.308  | 0.544  | -0.228 | -0.191 |
| C14:1 | 0.583  | -0.063 | 0.371  | 0.001  |
| C16:1 | 0.764  | 0.176  | 0.248  | 0.179  |
| C18:1 | 0.841  | 0.348  | 0.213  | 0.144  |
| C20:1 | 0.270  | 0.884  | 0.147  | 0.065  |
| C22:1 | -0.129 | 0.738  | 0.535  | 0.012  |
| C24:1 | 0.240  | 0.490  | -0.347 | -0.135 |
| C16:2 | 0.534  | 0.117  | -0.053 | -0.062 |
| C18:2 | 0.815  | 0.023  | 0.052  | 0.137  |
| C18:3 | 0.495  | 0.552  | 0.132  | 0.022  |
| C18:4 | 0.192  | -0.003 | -0.142 | -0.221 |
| C20:2 | 0.146  | 0.284  | 0.736  | 0.089  |
| C20:3 | 0.363  | 0.056  | 0.095  | 0.825  |
| C20:4 | 0.627  | 0.197  | 0.094  | 0.353  |
| C20:5 | 0.262  | -0.400 | -0.116 | 0.045  |
| C22:3 | -0.060 | -0.045 | 0.003  | 0.277  |
| C22:4 | 0.216  | -0.031 | 0.030  | 0.801  |
| C22:5 | 0.096  | -0.086 | -0.001 | 0.725  |
| C22:6 | -0.052 | 0.087  | -0.172 | 0.334  |

---
